# Supplementary figures and images for: Systematized Review of Psychotherapeutic Components of Psilocybin-Assisted Psychotherapy
Source: Atypon-hosted journal article supplement (doi:10.1176/appi.psychotherapy.20200055), 2021-07-23

Supplemental Figure: Flow Diagram for the Search Selection of Articles to Review

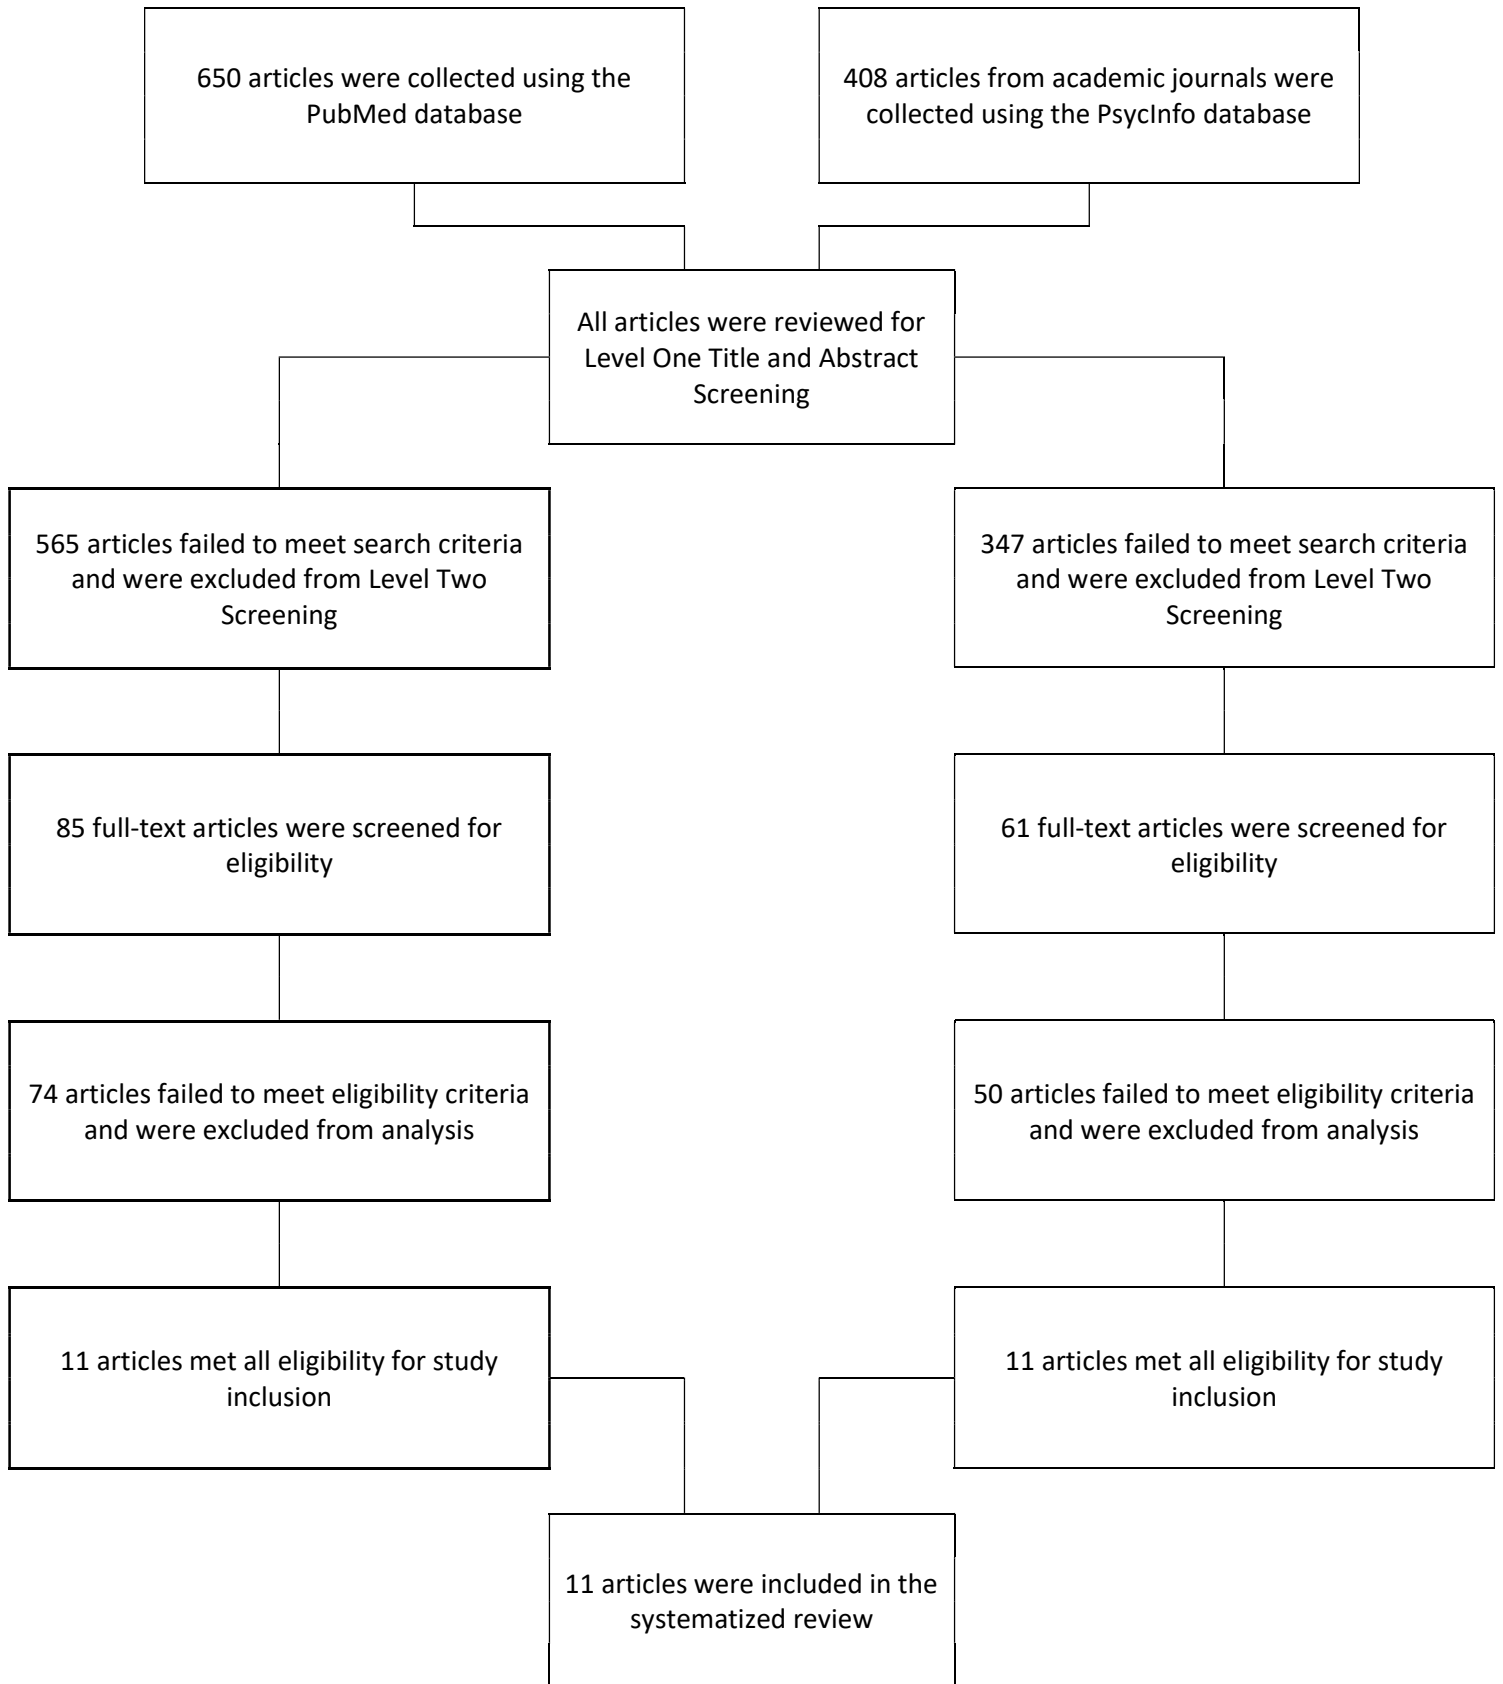

Supplement: appi.psychotherapy.20200055.ds001.pdf [file appi.psychotherapy.20200055.ds001.pdf]
